# Supplementary material for: Comparative Genomic Reveals Clonal Heterogeneity in Persistent Staphylococcus aureus Infection
Source: PubMed Central journal article supplement (PMC8900520; doi:10.3389/fcimb.2022.817841), 2022-02-21
Supplement: DataSheet_1.pdf [file DataSheet_1.pdf]

**Supplementary Table 2: List of SNPs.**

| CHR    | POS    | B1 | B2 | B3 | B4 | B5 | B6 | B7 | B8 | B9 | D1 | D2 | D3 | D4 | D5 | D6 | EFFECT                                       | GENE   | PRODUCT                                               |
|--------|--------|----|----|----|----|----|----|----|----|----|----|----|----|----|----|----|----------------------------------------------|--------|-------------------------------------------------------|
| NODE_1 | 44621  | C  | C  | C  | C  | T  | T  | C  | C  | C  | C  | T  | T  | C  | T  | T  | missense_variant<br>c.482G>A<br>p.Gly161Asp  | rpIF   | 50S ribosomal protein L6                              |
| NODE_1 | 182969 | C  | C  | C  | C  | C  | C  | T  | T  | T  | T  | C  | C  | T  | C  | C  | missense_variant<br>c.724C>T p.Pro242Ser     |        | hypothetical protein                                  |
| NODE_1 | 183464 | T  | T  | G  | G  | T  | T  | T  | T  | T  | T  | T  | T  | T  | T  | T  | missense_variant<br>c.1219T>G<br>p.Phe407Val |        | hypothetical protein                                  |
| NODE_1 | 188200 | C  | C  | C  | C  | C  | C  | C  | C  | T  | T  | C  | C  | C  | C  | C  | missense_variant<br>c.110C>T p.Thr37Ile      | sarZ   | HTH-type transcriptional regulator SarZ               |
| NODE_1 | 457917 | T  | T  | T  | T  | T  | T  | T  | T  | T  | T  | C  | C  | T  | C  | C  |                                              |        |                                                       |
| NODE_1 | 458671 | T  | T  | T  | C  | T  | T  | T  | T  | T  | T  | T  | T  | T  | T  | T  | synonymous_variant<br>c.258A>G p.Gln86Gln    | arcR   | HTH-type transcriptional regulator ArcR               |
| NODE_1 | 525887 | T  | T  | T  | T  | T  | T  | T  | T  | T  | T  | T  | T  | A  | T  | T  | synonymous_variant<br>c.60A>T p.Thr20Thr     | ykoD_1 | Putative HMP/thiamine import ATP-binding protein YkoD |
| NODE_1 | 561236 | T  | T  | T  | T  | T  | T  | T  | T  | T  | T  | T  | T  | T  | C  | T  | synonymous_variant<br>c.660T>C p.Thr220Thr   | gyrA   | DNA gyrase subunit A                                  |
| NODE_1 | 562432 | C  | C  | C  | C  | T  | T  | C  | C  | C  | C  | T  | T  | C  | T  | T  | missense_variant<br>c.1856C>T p.Thr619Ile    | gyrA   | DNA gyrase subunit A                                  |

|             |        |   |   |   |   |   |   |   |   |   |   |   |   |   |   |   |                                           |      |                                         |
|-------------|--------|---|---|---|---|---|---|---|---|---|---|---|---|---|---|---|-------------------------------------------|------|-----------------------------------------|
| NODE_1      | 626418 | G | G | G | G | G | G | A | A | A | A | G | G | A | G | G | stop_gained c.448C>T<br>p.Gln150*         | spa  | Immunoglobulin G-binding protein A      |
| NODE_1      | 628320 | T | T | T | T | T | T | T | T | T | T | T | C | T | T | T |                                           |      |                                         |
| NODE_1      | 752886 | G | G | A | A | G | G | G | G | G | G | G | G | G | G | G | stop_gained c.684G>A<br>p.Trp228*         | uhpT | Hexose-6-phosphate:phosphate antiporter |
| NODE_1      | 753275 | G | G | G | G | T | T | G | G | G | G | T | T | G | T | T | missense_variant c.1073G>T<br>p.Gly358Val | uhpT | Hexose-6-phosphate:phosphate antiporter |
| NODE_1      | 755422 | A | A | A | A | A | A | T | T | T | T | A | A | T | A | A | stop_gained c.827T>A<br>p.Leu276*         |      | putative sensor-like histidine kinase   |
| NODE_1      | 887607 | A | G | A | A | A | A | A | A | A | A | A | A | A | A | A | missense_variant c.478T>C<br>p.Trp160Arg  | glpT | Glycerol-3-phosphate transporter        |
| NODE_1      | 887624 | C | C | C | C | T | T | C | C | C | C | T | T | C | T | T | missense_variant c.461G>A<br>p.Gly154Glu  | glpT | Glycerol-3-phosphate transporter        |
| NODE_1      | 960289 | A | A | A | A | A | A | A | A | A | A | A | A | A | A | C | synonymous_variant c.216A>C<br>p.Thr72Thr | ssl1 | Staphylococcal superantigen-like 1      |
| NODE_1      | 971750 | T | T | T | T | T | T | T | T | T | T | T | T | C | T | T |                                           |      |                                         |
| NODE_1<br>1 | 11467  | G | G | G | G | G | G | G | G | G | G | G | G | A | G | G | missense_variant c.751G>A<br>p.Val251Met  |      | hypothetical protein                    |
| NODE_1<br>1 | 16959  | A | A | A | A | A | A | A | A | A | A | A | A | A | A | G | synonymous_variant c.231A>G<br>p.Ala77Ala | sepA | Multidrug resistance efflux pump SepA   |
| NODE_2      | 79686  | A | A | A | A | A | A | T | T | T | T | A | A | T | A | A |                                           |      |                                         |

Supplementary Material

|               |        |   |   |   |   |   |   |   |   |   |   |   |   |   |   |   |                                              |        |                                  |
|---------------|--------|---|---|---|---|---|---|---|---|---|---|---|---|---|---|---|----------------------------------------------|--------|----------------------------------|
| <b>NODE_2</b> | 93673  | C | C | T | T | C | C | C | C | C | C | C | C | C | C | C | missense_variant<br>c.85C>T p.His29Tyr       | cspA_1 | Cold shock protein CspA          |
| <b>NODE_2</b> | 93766  | G | G | G | G | A | A | A | A | A | A | A | A | A | A | A | missense_variant<br>c.178G>A p.Ala60Thr      | cspA_1 | Cold shock protein CspA          |
| <b>NODE_2</b> | 146090 | C | C | T | T | C | C | C | C | C | C | C | C | C | C | C | missense_variant<br>c.1411G>A<br>p.Glu471Lys | parE   | DNA topoisomerase 4<br>subunit B |
| <b>NODE_2</b> | 265051 | C | C | C | C | C | C | C | C | C | C | C | C | T | C | C | missense_variant<br>c.188G>A p.Gly63Asp      | topA   | DNA topoisomerase 1              |
| <b>NODE_2</b> | 408124 | G | A | G | G | G | G | G | G | G | G | G | G | G | G | G | stop_gained c.994C>T<br>p.Gln332*            | pycA   | Pyruvate carboxylase             |
| <b>NODE_2</b> | 411085 | G | C | G | G | G | G | G | G | G | G | G | G | G | G | G |                                              |        |                                  |
| <b>NODE_2</b> | 418613 | G | A | G | G | G | G | G | G | G | G | G | G | G | G | G |                                              |        |                                  |
| <b>NODE_2</b> | 515535 | G | G | G | G | G | G | T | T | T | T | G | G | G | G | G |                                              |        |                                  |
| <b>NODE_2</b> | 515569 | C | C | C | C | C | C | T | T | T | T | C | C | T | C | C |                                              |        |                                  |
| <b>NODE_2</b> | 525857 | C | T | C | C | C | C | C | C | C | C | C | C | C | C | C | missense_variant<br>c.491C>T p.Ser164Phe     |        | hypothetical protein             |
| <b>NODE_2</b> | 530801 | T | T | T | T | T | T | C | C | C | C | T | T | C | T | T | missense_variant<br>c.280A>G p.Ile94Val      | spxA   | Regulatory protein Spx           |
| <b>NODE_2</b> | 543962 | A | A | G | G | A | A | A | A | A | A | A | A | A | A | A |                                              |        |                                  |
| <b>NODE_2</b> | 643649 | A | T | A | A | A | A | A | A | A | A | A | A | A | A | A | stop_gained c.1182T>A<br>p.Tyr394*           | clfA   | Clumping factor A                |

|               |        |   |   |   |   |   |   |   |   |   |   |   |   |   |   |   |                                              |      |                                             |
|---------------|--------|---|---|---|---|---|---|---|---|---|---|---|---|---|---|---|----------------------------------------------|------|---------------------------------------------|
| <b>NODE_2</b> | 801375 | G | G | G | G | A | A | G | G | G | G | A | A | G | A | A |                                              |      |                                             |
| <b>NODE_2</b> | 805464 | C | C | C | C | C | C | C | C | C | C | C | C | C | C | T |                                              |      |                                             |
| <b>NODE_2</b> | 846956 | T | T | T | T | T | T | T | T | T | T | T | C | T | T | T | missense_variant<br>c.149A>G p.Lys50Arg      |      | hypothetical protein                        |
| <b>NODE_2</b> | 907981 | G | G | A | A | G | G | G | G | G | G | G | G | G | G | G | missense_variant<br>c.1739C>T<br>p.Ala580Val | fusA | Elongation factor G                         |
| <b>NODE_2</b> | 917151 | A | G | G | G | G | G | G | G | G | G | G | G | G | G | G | missense_variant<br>c.1441T>C<br>p.Tyr481His | rpoB | DNA-directed RNA<br>polymerase subunit beta |
| <b>NODE_2</b> | 917179 | G | G | G | G | C | C | C | C | C | C | C | C | C | C | C | missense_variant<br>c.1413C>G<br>p.Asp471Glu | rpoB | DNA-directed RNA<br>polymerase subunit beta |
| <b>NODE_2</b> | 917202 | A | A | G | G | A | A | A | A | A | A | A | A | A | A | A | missense_variant<br>c.1390T>C<br>p.Ser464Pro | rpoB | DNA-directed RNA<br>polymerase subunit beta |
| <b>NODE_2</b> | 942440 | C | C | C | C | C | C | C | C | C | C | C | T | C | C | C |                                              |      |                                             |
| <b>NODE_2</b> | 942452 | A | A | A | A | A | A | A | A | A | A | A | G | A | A | A |                                              |      |                                             |
| <b>NODE_2</b> | 942485 | T | T | T | T | T | T | T | T | T | T | T | C | T | T | T |                                              |      |                                             |
| <b>NODE_3</b> | 38470  | T | T | T | T | T | T | T | T | T | T | T | T | T | T | C | synonymous_variant<br>c.516T>C p.Arg172Arg   | rlhA | 23S rRNA 5-<br>hydroxycytidine<br>synthase  |
| <b>NODE_3</b> | 134055 | C | C | C | C | C | C | C | C | T | C | C | C | C | C | C | stop_gained c.706C>T<br>p.Gln236*            | malL | Oligo-1,6-glucosidase                       |

Supplementary Material

|               |        |   |   |   |   |   |   |   |   |   |   |   |   |   |   |   |                                            |       |                                     |
|---------------|--------|---|---|---|---|---|---|---|---|---|---|---|---|---|---|---|--------------------------------------------|-------|-------------------------------------|
| <b>NODE_3</b> | 167055 | T | T | T | T | A | A | T | T | T | T | A | A | T | A | A | missense_variant<br>c.264T>A p.Phe88Leu    | der_2 | GTPase Der                          |
| <b>NODE_4</b> | 153708 | A | A | A | A | A | A | A | A | A | G | A | A | A | A | A | synonymous_variant<br>c.969A>G p.Val323Val | pepS  | Aminopeptidase PepS                 |
| <b>NODE_6</b> | 18020  | T | T | T | C | T | T | T | T | T | T | T | T | T | T | T | missense_variant<br>c.361T>C p.Tyr121His   |       | IS1182 family<br>transposase ISSau3 |
| <b>NODE_6</b> | 46531  | G | G | G | G | G | G | T | T | G | G | G | G | G | G | G | missense_variant<br>c.409G>T p.Val137Phe   |       | hypothetical protein                |
| <b>NODE_9</b> | 42869  | T | T | T | T | T | T | C | C | C | C | T | T | C | T | T |                                            |       |                                     |

Abbr.: For numeration of isolates, see Supplementary Figure 1.

**Supplementary Table 3: Accessory genome.**

| Gene                        | Annotation                                                                                | No. of isolates | B 1 | B 2 | B 3 | B 4 | B 5 | B 6 | B 7 | B 8 | B 9 | D 1 | D 2 | D 3 | D 4 | D 5 | D 6 |
|-----------------------------|-------------------------------------------------------------------------------------------|-----------------|-----|-----|-----|-----|-----|-----|-----|-----|-----|-----|-----|-----|-----|-----|-----|
| <i>aceF</i>                 | Dihydrolipoyllysine-residue acetyltransferase component of pyruvate dehydrogenase complex | 1               | 0   | 0   | 0   | 0   | 0   | 0   | 0   | 0   | 0   | 0   | 0   | 1   | 0   | 0   | 0   |
| <i>alsT_1</i>               | Amino-acid carrier protein AlsT                                                           | 1               | 0   | 0   | 0   | 0   | 0   | 0   | 0   | 0   | 0   | 0   | 0   | 0   | 0   | 0   | 1   |
| <i>clfA_1</i>               | Clumping factor A                                                                         | 1               | 0   | 1   | 0   | 0   | 0   | 0   | 0   | 0   | 0   | 0   | 0   | 0   | 0   | 0   | 0   |
| <i>clpP_2</i>               | ATP-dependent Clp protease proteolytic subunit                                            | 6               | 1   | 0   | 0   | 0   | 0   | 0   | 1   | 1   | 1   | 1   | 0   | 0   | 1   | 0   | 0   |
| <i>codY</i>                 | GTP-sensing transcriptional pleiotropic repressor CodY                                    | 14              | 1   | 1   | 1   | 1   | 1   | 1   | 1   | 1   | 1   | 1   | 1   | 0   | 1   | 1   | 1   |
| <i>dltD_2</i>               | Protein DltD                                                                              | 1               | 0   | 1   | 0   | 0   | 0   | 0   | 0   | 0   | 0   | 0   | 0   | 0   | 0   | 0   | 0   |
| <i>est_2</i>                | Carboxylesterase                                                                          | 2               | 0   | 0   | 0   | 0   | 1   | 1   | 0   | 0   | 0   | 0   | 0   | 0   | 0   | 0   | 0   |
| <i>glpT_2</i>               | Glycerol-3-phosphate transporter                                                          | 5               | 0   | 0   | 0   | 0   | 0   | 0   | 1   | 1   | 1   | 1   | 0   | 0   | 1   | 0   | 0   |
| <i>group_1</i>              | IS1182 family transposase ISSau3                                                          | 8               | 0   | 1   | 0   | 0   | 1   | 1   | 1   | 0   | 0   | 0   | 1   | 1   | 1   | 1   | 0   |
| <i>group_10</i><br><i>0</i> | hypothetical protein                                                                      | 6               | 1   | 0   | 0   | 0   | 0   | 0   | 1   | 1   | 1   | 1   | 0   | 0   | 1   | 0   | 0   |

|                             |                      |   |   |   |   |   |   |   |   |   |   |   |   |   |   |   |   |
|-----------------------------|----------------------|---|---|---|---|---|---|---|---|---|---|---|---|---|---|---|---|
| <i>group_10</i><br><i>1</i> | hypothetical protein | 6 | 1 | 0 | 0 | 0 | 0 | 0 | 1 | 1 | 1 | 1 | 0 | 0 | 1 | 0 | 0 |
| <i>group_10</i><br><i>2</i> | hypothetical protein | 6 | 1 | 0 | 0 | 0 | 0 | 0 | 1 | 1 | 1 | 1 | 0 | 0 | 1 | 0 | 0 |
| <i>group_10</i><br><i>3</i> | hypothetical protein | 6 | 1 | 0 | 0 | 0 | 0 | 0 | 1 | 1 | 1 | 1 | 0 | 0 | 1 | 0 | 0 |
| <i>group_10</i><br><i>4</i> | hypothetical protein | 6 | 1 | 0 | 0 | 0 | 0 | 0 | 1 | 1 | 1 | 1 | 0 | 0 | 1 | 0 | 0 |
| <i>group_10</i><br><i>5</i> | hypothetical protein | 6 | 1 | 0 | 0 | 0 | 0 | 0 | 1 | 1 | 1 | 1 | 0 | 0 | 1 | 0 | 0 |
| <i>group_10</i><br><i>6</i> | hypothetical protein | 6 | 1 | 0 | 0 | 0 | 0 | 0 | 1 | 1 | 1 | 1 | 0 | 0 | 1 | 0 | 0 |
| <i>group_10</i><br><i>8</i> | hypothetical protein | 6 | 1 | 0 | 0 | 0 | 0 | 0 | 1 | 1 | 1 | 1 | 0 | 0 | 1 | 0 | 0 |
| <i>group_10</i><br><i>9</i> | hypothetical protein | 6 | 1 | 0 | 0 | 0 | 0 | 0 | 1 | 1 | 1 | 1 | 0 | 0 | 1 | 0 | 0 |
| <i>group_11</i><br><i>0</i> | hypothetical protein | 6 | 1 | 0 | 0 | 0 | 0 | 0 | 1 | 1 | 1 | 1 | 0 | 0 | 1 | 0 | 0 |
| <i>group_11</i><br><i>1</i> | hypothetical protein | 6 | 1 | 0 | 0 | 0 | 0 | 0 | 1 | 1 | 1 | 1 | 0 | 0 | 1 | 0 | 0 |
| <i>group_11</i><br><i>2</i> | hypothetical protein | 6 | 1 | 0 | 0 | 0 | 0 | 0 | 1 | 1 | 1 | 1 | 0 | 0 | 1 | 0 | 0 |
| <i>group_11</i><br><i>3</i> | hypothetical protein | 6 | 1 | 0 | 0 | 0 | 0 | 0 | 1 | 1 | 1 | 1 | 0 | 0 | 1 | 0 | 0 |



|                      |                      |   |   |   |   |   |   |   |   |   |   |   |   |   |   |   |   |
|----------------------|----------------------|---|---|---|---|---|---|---|---|---|---|---|---|---|---|---|---|
| <i>group_11</i><br>4 | hypothetical protein | 6 | 1 | 0 | 0 | 0 | 0 | 0 | 1 | 1 | 1 | 1 | 0 | 0 | 1 | 0 | 0 |
| <i>group_11</i><br>5 | hypothetical protein | 6 | 1 | 0 | 0 | 0 | 0 | 0 | 1 | 1 | 1 | 1 | 0 | 0 | 1 | 0 | 0 |
| <i>group_11</i><br>6 | hypothetical protein | 6 | 1 | 0 | 0 | 0 | 0 | 0 | 1 | 1 | 1 | 1 | 0 | 0 | 1 | 0 | 0 |
| <i>group_11</i><br>7 | hypothetical protein | 6 | 1 | 0 | 0 | 0 | 0 | 0 | 1 | 1 | 1 | 1 | 0 | 0 | 1 | 0 | 0 |
| <i>group_11</i><br>8 | hypothetical protein | 6 | 1 | 0 | 0 | 0 | 0 | 0 | 1 | 1 | 1 | 1 | 0 | 0 | 1 | 0 | 0 |
| <i>group_11</i><br>9 | hypothetical protein | 6 | 1 | 0 | 0 | 0 | 0 | 0 | 1 | 1 | 1 | 1 | 0 | 0 | 1 | 0 | 0 |
| <i>group_12</i><br>0 | hypothetical protein | 6 | 1 | 0 | 0 | 0 | 0 | 0 | 1 | 1 | 1 | 1 | 0 | 0 | 1 | 0 | 0 |
| <i>group_12</i><br>1 | hypothetical protein | 6 | 1 | 0 | 0 | 0 | 0 | 0 | 1 | 1 | 1 | 1 | 0 | 0 | 1 | 0 | 0 |
| <i>group_12</i><br>2 | hypothetical protein | 6 | 1 | 0 | 0 | 0 | 0 | 0 | 1 | 1 | 1 | 1 | 0 | 0 | 1 | 0 | 0 |
| <i>group_12</i><br>3 | hypothetical protein | 6 | 1 | 0 | 0 | 0 | 0 | 0 | 1 | 1 | 1 | 1 | 0 | 0 | 1 | 0 | 0 |
| <i>group_12</i><br>5 | hypothetical protein | 6 | 1 | 0 | 0 | 0 | 0 | 0 | 1 | 1 | 1 | 1 | 0 | 0 | 1 | 0 | 0 |
| <i>group_12</i><br>6 | hypothetical protein | 6 | 1 | 0 | 0 | 0 | 0 | 0 | 1 | 1 | 1 | 1 | 0 | 0 | 1 | 0 | 0 |
| <i>group_12</i><br>7 | hypothetical protein | 6 | 1 | 0 | 0 | 0 | 0 | 0 | 1 | 1 | 1 | 1 | 0 | 0 | 1 | 0 | 0 |

|                      |                      |   |   |   |   |   |   |   |   |   |   |   |   |   |   |   |   |
|----------------------|----------------------|---|---|---|---|---|---|---|---|---|---|---|---|---|---|---|---|
| <i>group_12</i><br>8 | hypothetical protein | 6 | 1 | 0 | 0 | 0 | 0 | 0 | 1 | 1 | 1 | 1 | 0 | 0 | 1 | 0 | 0 |
| <i>group_12</i><br>9 | hypothetical protein | 6 | 1 | 0 | 0 | 0 | 0 | 0 | 1 | 1 | 1 | 1 | 0 | 0 | 1 | 0 | 0 |
| <i>group_13</i><br>0 | hypothetical protein | 6 | 1 | 0 | 0 | 0 | 0 | 0 | 1 | 1 | 1 | 1 | 0 | 0 | 1 | 0 | 0 |
| <i>group_13</i><br>1 | hypothetical protein | 6 | 1 | 0 | 0 | 0 | 0 | 0 | 1 | 1 | 1 | 1 | 0 | 0 | 1 | 0 | 0 |
| <i>group_13</i><br>2 | hypothetical protein | 6 | 1 | 0 | 0 | 0 | 0 | 0 | 1 | 1 | 1 | 1 | 0 | 0 | 1 | 0 | 0 |
| <i>group_13</i><br>3 | hypothetical protein | 6 | 1 | 0 | 0 | 0 | 0 | 0 | 1 | 1 | 1 | 1 | 0 | 0 | 1 | 0 | 0 |
| <i>group_13</i><br>4 | hypothetical protein | 6 | 1 | 0 | 0 | 0 | 0 | 0 | 1 | 1 | 1 | 1 | 0 | 0 | 1 | 0 | 0 |
| <i>group_13</i><br>5 | hypothetical protein | 6 | 1 | 0 | 0 | 0 | 0 | 0 | 1 | 1 | 1 | 1 | 0 | 0 | 1 | 0 | 0 |
| <i>group_13</i><br>6 | hypothetical protein | 6 | 1 | 0 | 0 | 0 | 0 | 0 | 1 | 1 | 1 | 1 | 0 | 0 | 1 | 0 | 0 |
| <i>group_13</i><br>7 | hypothetical protein | 6 | 1 | 0 | 0 | 0 | 0 | 0 | 1 | 1 | 1 | 1 | 0 | 0 | 1 | 0 | 0 |
| <i>group_13</i><br>8 | hypothetical protein | 6 | 1 | 0 | 0 | 0 | 0 | 0 | 1 | 1 | 1 | 1 | 0 | 0 | 1 | 0 | 0 |
| <i>group_13</i><br>9 | hypothetical protein | 6 | 1 | 0 | 0 | 0 | 0 | 0 | 1 | 1 | 1 | 1 | 0 | 0 | 1 | 0 | 0 |

|                             |                                       |    |   |   |   |   |   |   |   |   |   |   |   |   |   |   |   |   |
|-----------------------------|---------------------------------------|----|---|---|---|---|---|---|---|---|---|---|---|---|---|---|---|---|
| <i>group_14</i><br><i>0</i> | hypothetical protein                  | 6  | 1 | 0 | 0 | 0 | 0 | 0 | 0 | 1 | 1 | 1 | 1 | 0 | 0 | 1 | 0 | 0 |
| <i>group_14</i><br><i>1</i> | hypothetical protein                  | 6  | 1 | 0 | 0 | 0 | 0 | 0 | 0 | 1 | 1 | 1 | 1 | 0 | 0 | 1 | 0 | 0 |
| <i>group_14</i><br><i>3</i> | putative autolysin PH                 | 6  | 1 | 0 | 0 | 0 | 0 | 0 | 0 | 1 | 1 | 1 | 1 | 0 | 0 | 1 | 0 | 0 |
| <i>group_14</i><br><i>5</i> | hypothetical protein                  | 14 | 1 | 1 | 1 | 1 | 1 | 1 | 1 | 1 | 1 | 1 | 1 | 1 | 0 | 1 | 1 | 1 |
| <i>group_14</i><br><i>6</i> | IS200/IS605 family transposase ISSep3 | 5  | 1 | 1 | 0 | 1 | 1 | 0 | 0 | 0 | 0 | 0 | 0 | 0 | 0 | 0 | 1 | 0 |
| <i>group_14</i><br><i>7</i> | hypothetical protein                  | 8  | 0 | 1 | 0 | 1 | 1 | 1 | 1 | 1 | 0 | 1 | 0 | 0 | 0 | 1 | 0 | 0 |
| <i>group_14</i><br><i>8</i> | hypothetical protein                  | 7  | 0 | 1 | 1 | 1 | 1 | 1 | 0 | 1 | 0 | 0 | 0 | 0 | 0 | 0 | 1 | 0 |
| <i>group_14</i><br><i>9</i> | hypothetical protein                  | 9  | 0 | 1 | 0 | 1 | 1 | 1 | 1 | 0 | 0 | 0 | 1 | 1 | 1 | 1 | 1 | 0 |
| <i>group_15</i><br><i>0</i> | hypothetical protein                  | 6  | 1 | 0 | 0 | 0 | 0 | 0 | 0 | 1 | 1 | 1 | 1 | 0 | 0 | 1 | 0 | 0 |
| <i>group_15</i><br><i>1</i> | hypothetical protein                  | 1  | 0 | 0 | 0 | 0 | 0 | 0 | 0 | 0 | 0 | 0 | 0 | 0 | 1 | 0 | 0 | 0 |
| <i>group_17</i>             | hypothetical protein                  | 1  | 0 | 0 | 0 | 0 | 0 | 0 | 0 | 0 | 0 | 0 | 0 | 0 | 1 | 0 | 0 | 0 |
| <i>group_2</i>              | IS1182 family transposase ISSau3      | 1  | 0 | 0 | 0 | 0 | 0 | 0 | 0 | 0 | 0 | 0 | 0 | 0 | 0 | 0 | 1 | 0 |
| <i>group_21</i>             | hypothetical protein                  | 1  | 0 | 1 | 0 | 0 | 0 | 0 | 0 | 0 | 0 | 0 | 0 | 0 | 0 | 0 | 0 | 0 |

|                              |                                       |    |   |   |   |   |   |   |   |   |   |   |   |   |   |   |   |
|------------------------------|---------------------------------------|----|---|---|---|---|---|---|---|---|---|---|---|---|---|---|---|
| <i>group_22</i>              | putative sensor-like histidine kinase | 12 | 1 | 0 | 0 | 0 | 1 | 1 | 1 | 1 | 1 | 1 | 1 | 1 | 1 | 1 | 1 |
| <i>group_23</i>              | putative sensor-like histidine kinase | 8  | 0 | 1 | 1 | 1 | 0 | 0 | 1 | 1 | 1 | 1 | 0 | 0 | 1 | 0 | 0 |
| <i>group_25</i><br><i>56</i> | hypothetical protein                  | 14 | 1 | 1 | 1 | 1 | 1 | 1 | 1 | 1 | 1 | 1 | 1 | 1 | 0 | 1 | 1 |
| <i>group_25</i><br><i>57</i> | hypothetical protein                  | 3  | 0 | 0 | 0 | 0 | 0 | 0 | 1 | 0 | 0 | 0 | 1 | 0 | 0 | 0 | 1 |
| <i>group_3</i>               | IS1182 family transposase ISSau3      | 1  | 0 | 0 | 0 | 0 | 0 | 0 | 0 | 0 | 0 | 0 | 0 | 0 | 1 | 0 | 0 |
| <i>group_4</i>               | IS1182 family transposase ISSau3      | 2  | 0 | 0 | 0 | 0 | 0 | 1 | 1 | 0 | 0 | 0 | 0 | 0 | 0 | 0 | 0 |
| <i>group_5</i>               | IS1182 family transposase ISSau3      | 9  | 0 | 1 | 0 | 1 | 1 | 1 | 1 | 0 | 0 | 0 | 1 | 1 | 1 | 1 | 0 |
| <i>group_55</i>              | hypothetical protein                  | 1  | 0 | 1 | 0 | 0 | 0 | 0 | 0 | 0 | 0 | 0 | 0 | 0 | 0 | 0 | 0 |
| <i>group_58</i>              | NAD-dependent malic enzyme            | 7  | 1 | 0 | 0 | 0 | 1 | 1 | 0 | 0 | 0 | 0 | 1 | 1 | 0 | 1 | 1 |
| <i>group_59</i>              | NAD-dependent malic enzyme            | 14 | 0 | 1 | 1 | 1 | 1 | 1 | 1 | 1 | 1 | 1 | 1 | 1 | 1 | 1 | 1 |
| <i>group_6</i>               | IS1182 family transposase ISSau3      | 9  | 0 | 1 | 0 | 1 | 1 | 1 | 1 | 0 | 0 | 0 | 1 | 1 | 1 | 1 | 0 |
| <i>group_7</i>               | IS1182 family transposase ISSau3      | 1  | 0 | 0 | 0 | 0 | 0 | 0 | 0 | 1 | 0 | 0 | 0 | 0 | 0 | 0 | 0 |

|                 |                                  |    |   |   |   |   |   |   |   |   |   |   |   |   |   |   |   |
|-----------------|----------------------------------|----|---|---|---|---|---|---|---|---|---|---|---|---|---|---|---|
| <i>group_8</i>  | IS1182 family transposase ISSau3 | 1  | 0 | 0 | 0 | 0 | 0 | 0 | 0 | 1 | 0 | 0 | 0 | 0 | 0 | 0 | 0 |
| <i>group_83</i> | hypothetical protein             | 14 | 1 | 1 | 1 | 1 | 1 | 1 | 1 | 1 | 1 | 1 | 1 | 1 | 0 | 1 | 1 |
| <i>group_84</i> | hypothetical protein             | 14 | 1 | 1 | 1 | 1 | 1 | 1 | 1 | 1 | 1 | 1 | 1 | 1 | 0 | 1 | 1 |
| <i>group_85</i> | hypothetical protein             | 14 | 1 | 1 | 1 | 1 | 1 | 1 | 1 | 1 | 1 | 1 | 1 | 1 | 0 | 1 | 1 |
| <i>group_87</i> | hypothetical protein             | 6  | 1 | 0 | 0 | 0 | 0 | 0 | 1 | 1 | 1 | 1 | 0 | 0 | 1 | 0 | 0 |
| <i>group_88</i> | hypothetical protein             | 6  | 1 | 0 | 0 | 0 | 0 | 0 | 1 | 1 | 1 | 1 | 0 | 0 | 1 | 0 | 0 |
| <i>group_89</i> | hypothetical protein             | 6  | 1 | 0 | 0 | 0 | 0 | 0 | 1 | 1 | 1 | 1 | 0 | 0 | 1 | 0 | 0 |
| <i>group_9</i>  | IS1182 family transposase ISSau3 | 6  | 0 | 0 | 1 | 0 | 0 | 1 | 0 | 0 | 1 | 1 | 0 | 0 | 0 | 1 | 1 |
| <i>group_90</i> | hypothetical protein             | 6  | 1 | 0 | 0 | 0 | 0 | 0 | 1 | 1 | 1 | 1 | 0 | 0 | 1 | 0 | 0 |
| <i>group_91</i> | hypothetical protein             | 6  | 1 | 0 | 0 | 0 | 0 | 0 | 1 | 1 | 1 | 1 | 0 | 0 | 1 | 0 | 0 |
| <i>group_93</i> | hypothetical protein             | 6  | 1 | 0 | 0 | 0 | 0 | 0 | 1 | 1 | 1 | 1 | 0 | 0 | 1 | 0 | 0 |
| <i>group_94</i> | hypothetical protein             | 6  | 1 | 0 | 0 | 0 | 0 | 0 | 1 | 1 | 1 | 1 | 0 | 0 | 1 | 0 | 0 |
| <i>group_95</i> | hypothetical protein             | 6  | 1 | 0 | 0 | 0 | 0 | 0 | 1 | 1 | 1 | 1 | 0 | 0 | 1 | 0 | 0 |

|                 |                                         |    |   |   |   |   |   |   |   |   |   |   |   |   |   |   |   |
|-----------------|-----------------------------------------|----|---|---|---|---|---|---|---|---|---|---|---|---|---|---|---|
| <i>group_96</i> | hypothetical protein                    | 6  | 1 | 0 | 0 | 0 | 0 | 0 | 1 | 1 | 1 | 1 | 0 | 0 | 1 | 0 | 0 |
| <i>group_97</i> | hypothetical protein                    | 6  | 1 | 0 | 0 | 0 | 0 | 0 | 1 | 1 | 1 | 1 | 0 | 0 | 1 | 0 | 0 |
| <i>group_98</i> | hypothetical protein                    | 6  | 1 | 0 | 0 | 0 | 0 | 0 | 1 | 1 | 1 | 1 | 0 | 0 | 1 | 0 | 0 |
| <i>group_99</i> | hypothetical protein                    | 6  | 1 | 0 | 0 | 0 | 0 | 0 | 1 | 1 | 1 | 1 | 0 | 0 | 1 | 0 | 0 |
| <i>hlb_1</i>    | Phospholipase C                         | 6  | 1 | 0 | 0 | 0 | 0 | 0 | 1 | 1 | 1 | 1 | 0 | 0 | 1 | 0 | 0 |
| <i>hpf_2</i>    | Ribosome hibernation promotion factor   | 4  | 0 | 0 | 0 | 0 | 0 | 0 | 1 | 1 | 1 | 1 | 0 | 0 | 0 | 0 | 0 |
| <i>hutH_1</i>   | Histidine ammonia-lyase                 | 1  | 0 | 0 | 0 | 0 | 0 | 0 | 0 | 0 | 0 | 0 | 0 | 0 | 0 | 0 | 1 |
| <i>lexA_2</i>   | LexA repressor                          | 6  | 1 | 0 | 0 | 0 | 0 | 0 | 1 | 1 | 1 | 1 | 0 | 0 | 1 | 0 | 0 |
| <i>malL</i>     | Oligo-1,6-glucosidase                   | 14 | 1 | 1 | 1 | 1 | 1 | 1 | 1 | 1 | 1 | 1 | 0 | 1 | 1 | 1 | 1 |
| <i>malL_2</i>   | Oligo-1,6-glucosidase                   | 2  | 0 | 0 | 0 | 0 | 0 | 0 | 0 | 0 | 1 | 0 | 1 | 0 | 0 | 0 | 0 |
| <i>malR</i>     | HTH-type transcriptional regulator MalR | 2  | 0 | 0 | 0 | 0 | 0 | 0 | 0 | 0 | 1 | 0 | 1 | 0 | 0 | 0 | 0 |
| <i>malR</i>     | HTH-type transcriptional regulator MalR | 14 | 1 | 1 | 1 | 1 | 1 | 1 | 1 | 1 | 0 | 1 | 1 | 1 | 1 | 1 | 1 |

|               |                                                 |    |   |   |   |   |   |   |   |   |   |   |   |   |   |   |   |
|---------------|-------------------------------------------------|----|---|---|---|---|---|---|---|---|---|---|---|---|---|---|---|
| <i>mntA_2</i> | Manganese-binding lipoprotein MntA              | 5  | 0 | 0 | 0 | 0 | 0 | 0 | 1 | 1 | 1 | 1 | 0 | 0 | 1 | 0 | 0 |
| <i>mprF</i>   | Phosphatidylglycerol lysyltransferase           | 14 | 1 | 1 | 1 | 1 | 1 | 1 | 1 | 1 | 1 | 1 | 1 | 1 | 1 | 1 | 0 |
| <i>mprF_2</i> | Phosphatidylglycerol lysyltransferase           | 6  | 0 | 0 | 0 | 0 | 0 | 0 | 1 | 1 | 1 | 1 | 0 | 0 | 1 | 0 | 1 |
| <i>prkC_2</i> | Serine/threonine-protein kinase PrkC            | 1  | 0 | 0 | 0 | 0 | 0 | 0 | 0 | 0 | 0 | 0 | 0 | 0 | 0 | 0 | 1 |
| <i>pycA_1</i> | Pyruvate carboxylase                            | 1  | 0 | 1 | 0 | 0 | 0 | 0 | 0 | 0 | 0 | 0 | 0 | 0 | 0 | 0 | 0 |
| <i>rsmH_1</i> | Ribosomal RNA small subunit methyltransferase H | 2  | 0 | 0 | 1 | 1 | 0 | 0 | 0 | 0 | 0 | 0 | 0 | 0 | 0 | 0 | 0 |
| <i>sak</i>    | Staphylokinase                                  | 6  | 1 | 0 | 0 | 0 | 0 | 0 | 1 | 1 | 1 | 1 | 0 | 0 | 1 | 0 | 0 |
| <i>scn_3</i>  | Staphylococcal complement inhibitor             | 6  | 1 | 0 | 0 | 0 | 0 | 0 | 1 | 1 | 1 | 1 | 0 | 0 | 1 | 0 | 0 |
| <i>spa_2</i>  | Immunoglobulin G-binding protein A              | 5  | 0 | 0 | 0 | 0 | 0 | 0 | 1 | 1 | 1 | 1 | 0 | 0 | 1 | 0 | 0 |
| <i>ssbA_2</i> | Single-stranded DNA-binding protein A           | 6  | 1 | 0 | 0 | 0 | 0 | 0 | 1 | 1 | 1 | 1 | 0 | 0 | 1 | 0 | 0 |
| <i>thiI_1</i> | putative tRNA sulfurtransferase                 | 1  | 0 | 0 | 0 | 0 | 0 | 0 | 0 | 0 | 0 | 0 | 0 | 0 | 0 | 0 | 1 |
| <i>uhpT</i>   | Hexose-6-phosphate:phosphate antiporter         | 10 | 1 | 1 | 1 | 1 | 1 | 1 | 0 | 0 | 0 | 0 | 1 | 1 | 0 | 1 | 1 |
| <i>uhpT</i>   | Hexose-6-phosphate:phosphate antiporter         | 8  | 0 | 1 | 1 | 1 | 0 | 0 | 1 | 1 | 1 | 1 | 0 | 0 | 1 | 0 | 0 |

|               |                               |   |   |   |   |   |   |   |   |   |   |   |   |   |   |   |   |   |
|---------------|-------------------------------|---|---|---|---|---|---|---|---|---|---|---|---|---|---|---|---|---|
| <i>xerC_3</i> | Tyrosine recombinase XerC     | 6 | 1 | 0 | 0 | 0 | 0 | 0 | 0 | 1 | 1 | 1 | 1 | 0 | 0 | 1 | 0 | 0 |
| <i>yic_3</i>  | Putative metal chaperone YciC | 2 | 0 | 0 | 1 | 1 | 0 | 0 | 0 | 0 | 0 | 0 | 0 | 0 | 0 | 0 | 0 | 0 |

---

Abbr.: For numeration of isolates, see Supplementary Figure 1. Absence of the respective gene is presented as 0, presence as 1.



**Supplementary Table 4: Phenotypic AMR.**

|            | IEC <sup>+</sup> |          |             |          |             |          |             |          |             |          |             |          | IEC <sup>-</sup> |          |             |          |             |          |             |          |             |          |             |          |             |          |             |          |             |          |
|------------|------------------|----------|-------------|----------|-------------|----------|-------------|----------|-------------|----------|-------------|----------|------------------|----------|-------------|----------|-------------|----------|-------------|----------|-------------|----------|-------------|----------|-------------|----------|-------------|----------|-------------|----------|
|            | B1               |          | B7          |          | B8          |          | B9          |          | D1          |          | D4          |          | B2               |          | B3          |          | B4          |          | B5          |          | B6          |          | D2          |          | D3          |          | D5          |          | D6          |          |
|            | MIC              | Int      | MIC         | Int      | MIC         | In.      | MIC         | Int      | MIC         | Int      | MIC         | Int      | MIC              | Int      | MIC         | Int      | MIC         | Int      | MIC         | Int      | MIC         | Int      | MIC         | Int      | MIC         | Int      | MIC         | Int      | MIC         | Int      |
| <b>OXA</b> | ≤0.25            | S        | ≤0.25       | S        | 0,5         | S        | 1           | S        | 0,5         | S        | ≤0.25       | S        | ≤0.25            | S        | 0,5         | S        | 0,5         | S        | 1*          | S        | 1*          | S        | 0,5         | S        | <b>16*</b>  | <b>R</b> | <b>12*</b>  | <b>R</b> | 1           | S        |
| <b>PEN</b> | ≤0.03            | S        | ≤0.03       | S        | ≤0.03       | S        | 0,12        | S        | ≤0.03       | S        | ≤0.03       | S        | ≤0.03            | S        | 0,12        | S        | 0,12        | S        | 0,06        | S        | 0,12        | S        | ≤0.03       | S        | 0,25        | S        | 0,25        | S        | 0,12        | S        |
| <b>LVX</b> | ≤0.12            | S        | 0,25        | S        | 0,5         | S        | 0,5         | S        | 0,25        | S        | 0,5         | S        | 0,5              | S        | 1           | S        | 1           | S        | 0,25        | S        | 1           | S        | 0,5         | S        | 0,25        | S        | 0,25        | S        | 0,25        | S        |
| <b>SXT</b> | ≤10              | S        | ≤10         | S        | ≤10         | S        | ≤10         | S        | ≤10         | S        | ≤10         | S        | ≤10              | S        | ≤10         | S        | ≤10         | S        | ≤10         | S        | ≤10         | S        | ≤10         | S        | ≤10         | S        | ≤10         | S        | ≤10         | S        |
| <b>GEN</b> | ≤0.5             | S        | ≤0.5        | S        | ≤0.5        | S        | ≤0.5        | S        | ≤0.5        | S        | ≤0.5        | S        | ≤0.5             | S        | ≤0.5        | S        | ≤0.5        | S        | ≤0.5        | S        | ≤0.5        | S        | ≤0.5        | S        | ≤0.5        | S        | ≤0.5        | S        | ≤0.5        | S        |
| <b>CLI</b> | 0,25             | S        | 0,25        | S        | 0,25        | S        | 0,25        | S        | 0,25        | S        | 0,25        | S        | 0,25             | S        | 0,25        | S        | ≤0.12       | S        | ≤0.12       | S        | ≤0.12       | S        | 0,25        | S        | ≤0.12       | S        | ≤0.12       | S        | 0,25        | S        |
| <b>ERY</b> | 1                | S        | 0,5         | S        | 0,5         | S        | 0,5         | S        | ≤0.25       | S        | ≤0.25       | S        | 1                | S        | 0,5         | S        | 1           | S        | 0,5         | S        | ≤0.25       | S        | ≤0.25       | S        | 0,5         | S        | 0,5         | S        | 0,5         | S        |
| <b>VAN</b> | 1                | S        | ≤0.5        | S        | 1           | S        | ≤0.5        | S        | ≤0.5        | S        | ≤0.5        | S        | ≤0.5             | S        | ≤0.5        | S        | ≤0.5        | S        | ≤0.5        | S        | ≤0.5        | S        | ≤0.5        | S        | ≤0.5        | S        | ≤0.5        | S        | ≤0.5        | S        |
| <b>TEC</b> | 2                | S        | ≤0.5        | S        | 1           | S        | ≤0.5        | S        | ≤0.5        | S        | 1           | S        | ≤0.5             | S        | 2           | S        | ≤0.5        | S        | ≤0.5        | S        | ≤0.5        | S        | 1           | S        | ≤0.5        | S        | ≤0.5        | S        | ≤0.5        | S        |
| <b>RIF</b> | <b>&gt;32*</b>   | <b>R</b> | 0,064*      | S        | 0,064*      | S        | 0,064*      | S        | 0,125*      | S        | 0,094*      | S        | 0,012*           | S        | <b>16*</b>  | <b>R</b> | <b>6*</b>   | <b>R</b> | 0,125*      | S        | 0,25*       | S        | 0,094*      | S        | 0,19*       | S        | 0,19*       | S        | 0,19*       | S        |
| <b>LZD</b> | 2                | S        | 4           | S        | 4           | S        | 2           | S        | 4           | S        | 2           | S        | 2                | S        | 2           | S        | 1           | S        | 4           | S        | 4           | S        | 4           | S        | 4           | S        | 4           | S        | 4           | S        |
| <b>TET</b> | ≤1               | S        | ≤1          | S        | ≤1          | S        | ≤1          | S        | ≤1          | S        | ≤1          | S        | ≤1               | S        | ≤1          | S        | ≤1          | S        | 2           | S        | ≤1          | S        | ≤1          | S        | ≤1          | S        | ≤1          | S        | ≤1          | S        |
| <b>TGC</b> | ≤0.12            | S        | ≤0.12       | S        | ≤0.12       | S        | ≤0.12       | S        | ≤0.12       | S        | ≤0.12       | S        | ≤0.12            | S        | ≤0.12       | S        | ≤0.12       | S        | ≤0.12       | S        | ≤0.12       | S        | ≤0.12       | S        | ≤0.12       | S        | ≤0.12       | S        | ≤0.12       | S        |
| <b>FOF</b> | ≤8               | S        | <b>≥128</b> | <b>R</b> | <b>≥128</b> | <b>R</b> | <b>≥128</b> | <b>R</b> | <b>≥128</b> | <b>R</b> | <b>≥128</b> | <b>R</b> | <b>≥128</b>      | <b>R</b> | <b>≥128</b> | <b>R</b> | <b>≥128</b> | <b>R</b> | <b>≥128</b> | <b>R</b> | <b>≥128</b> | <b>R</b> | <b>≥128</b> | <b>R</b> | <b>≥128</b> | <b>R</b> | <b>≥128</b> | <b>R</b> | <b>≥128</b> | <b>R</b> |
| <b>FA</b>  | ≤0.5             | S        | ≤0.5        | S        | ≤0.5        | S        | ≤0.5        | S        | ≤0.5        | S        | ≤0.5        | S        | ≤0.5             | S        | ≤0.5        | S        | ≤0.5        | S        | ≤0.5        | S        | ≤0.5        | S        | ≤0.5        | S        | ≤0.5        | S        | ≤0.5        | S        | ≤0.5        | S        |
| <b>DAP</b> | 0,25             | S        | ≤0.12       | S        | ≤0.12       | S        | ≤0.12       | S        | ≤0.12       | S        | ≤0.12       | S        | 1                | S        | 1           | S        | 0,5         | S        | ≤0.12       | S        | ≤0.12       | S        | 0,5         | S        | 0,5         | S        | 0,5         | S        | 0,5         | S        |

Abbr.: OXA oxacillin, PEN penicillin, LVX levofloxacin, SXT trimethoprim-sulfamethoxazole, GEN gentamicin, CLI clindamycin, ERY erythromycin, VAN vancomycin, TEC teicoplanin, RIF rifampicin, LZD linezolid, TET tetracycline, TGC tigecycline, FOF Fosfomycin, FA fusidic acid, DAP daptomycin, IEC immune evasion cluster, MIC minimal inhibitory concentration, Int interpretation. For enumeration of isolates, please see Supplementary Figure 1. \*MIC determined by MIC test strip.

### 3 Supplementary Figures

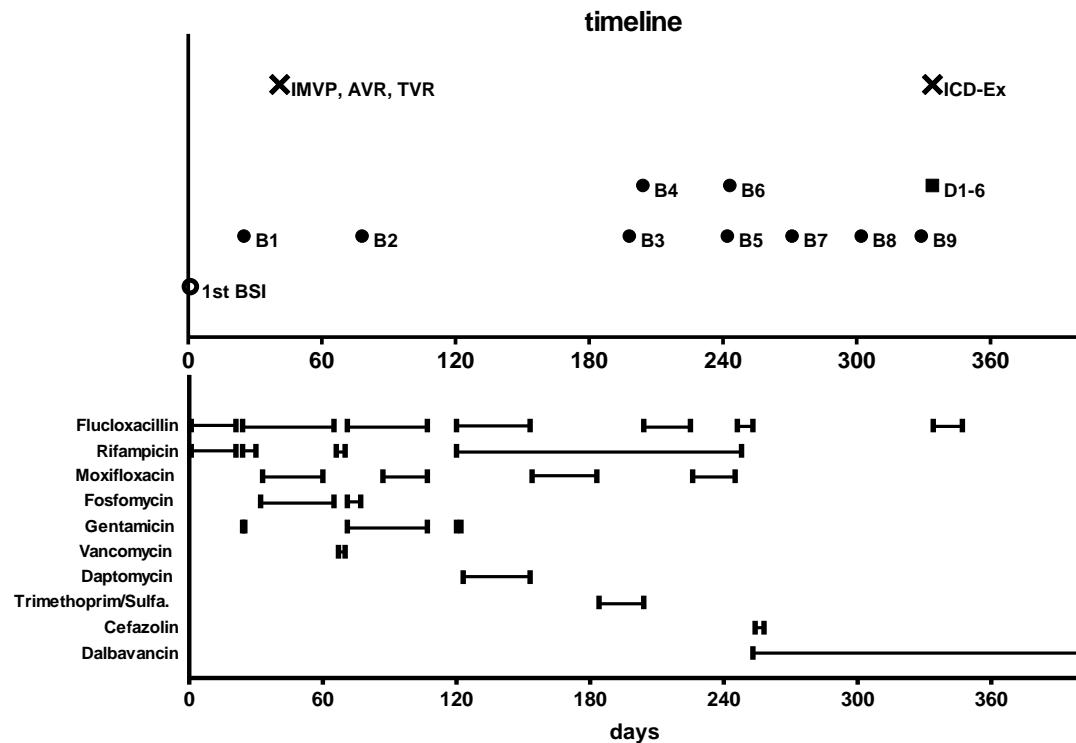

**Supplementary Figure 1.** Timeline of events and antibiotic therapy. Upper panel: Timeline of events. Day 0 is defined as the day of the first BSI episode (1<sup>st</sup> BSI). The *S. aureus* isolate of the first BSI was not available for analyses. B1-B9: Blood culture isolates of following BSI episodes. D1-D6: *S. aureus* isolates from the Device (implantable cardioverter-defibrillator, ICD). Abbr.: IMVP: Inspection of mitral valve prosthesis; AVR: Aortic valve replacement; TVR: Tricuspidal valve replacement; ICD-Ex: ICD explantation. There were no episodes of BSI after explantation of the ICD. Lower panel: Overview over antimicrobial therapy. The timespan an antibiotic was given is visible as black line. Dosages: Flucloxacillin 2 g every 4 h or 3 g every 6 h; rifampicin 450 mg every 12 h or 600 mg every 24h; moxifloxacin 400 mg every 24 h; fosfomycin 4 g or 5 g every 24 h adjusted to current renal function; gentamicin 240 mg, 200 mg, 160 mg or 80 mg every 2 h according to drug monitoring results; vancomycin 1000mg on the first day, then 500mg according to drug monitoring results; daptomycin 500 mg or 700 mg every 24 h; trimethoprim/sulfamethoxazole 960 mg every 12h; cefazolin 2 g every 8 h; dalbavancin 1500 mg every 7 days.

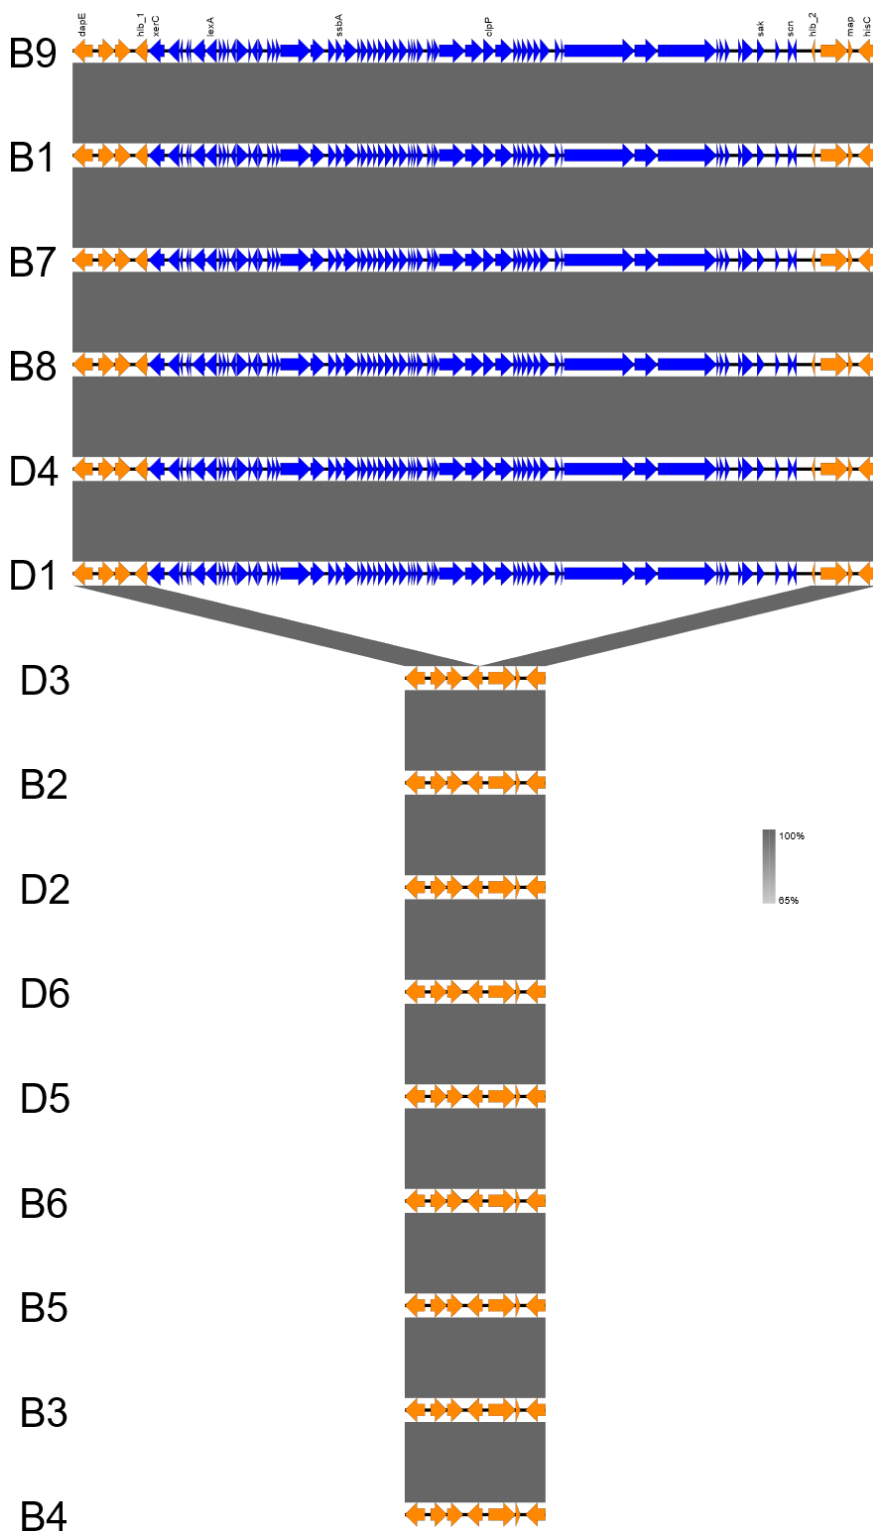

**Supplementary Figure 2. Genetic context of the prophage inserted in the *hlb* gene.** Abbr.: *dapE* probable succinyl-diaminopimelate desuccinylase; *hlb* hemolysin b; *xerC* tyrosine recombinase; *lexA* LexA repressor; *ssbA* *Staphylococcus aureus* single-stranded DNA-binding protein; *clpP* ATP-dependent Clp protease proteolytic subunit; *sak* staphylokinase; *scn* staphylococcal complement inhibitor; *map* Major histocompatibility complex class II analogue protein; *hisC* Histidinol-phosphate aminotransferase.

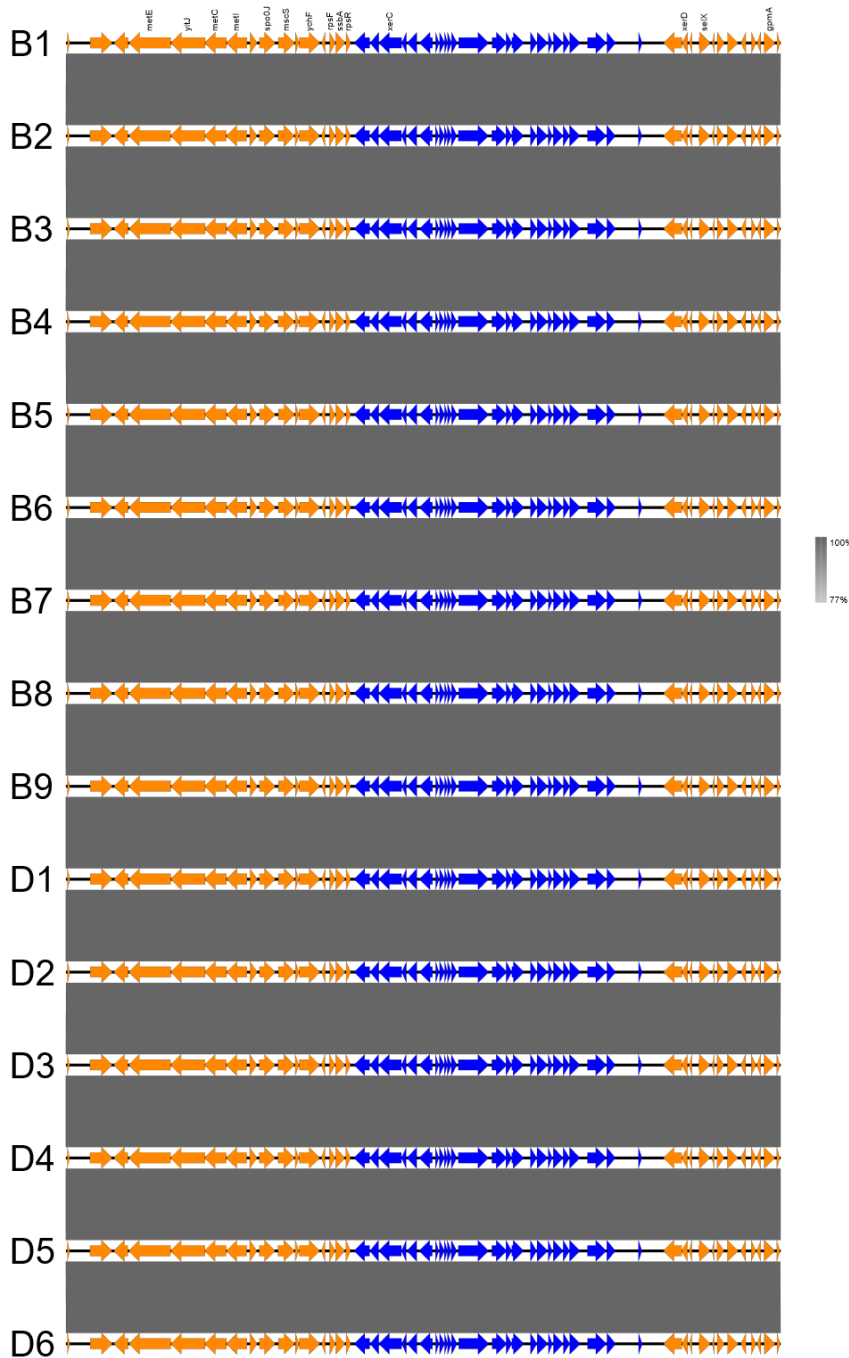

**Supplementary Figure 3. Genetic context of the second mobile genetic element inserted after the gene *ychF*.** Abbr.: *metE* 5-methyltetrahydropteroyltriglutamate-homocysteine methyltransferase; *yitJ* 5,10-methylenetetrahydrofolate reductase; *metC* aminotransferase class I/II-fold pyridoxal phosphate-dependent enzyme; *metI* Aminotransferase class I/II-fold pyridoxal phosphate-dependent enzyme; *spoOJ* SpoOJ protein; *mscS* mechanosensitive ion channel family protein; *ychF* ribosome-binding ATPase YchF; *rpsF* 30S ribosomal protein S6; *ssbA* single-stranded DNA-binding protein; *rpsR* 30S ribosomal protein S18; *xerC* Tyrosine recombinase XerC; *xerD* Tyrosine recombinase XerD; *selX* Enterotoxin-like toxin X; *gpmA* 2,3-bisphosphoglycerate-dependent phosphoglycerate mutase.

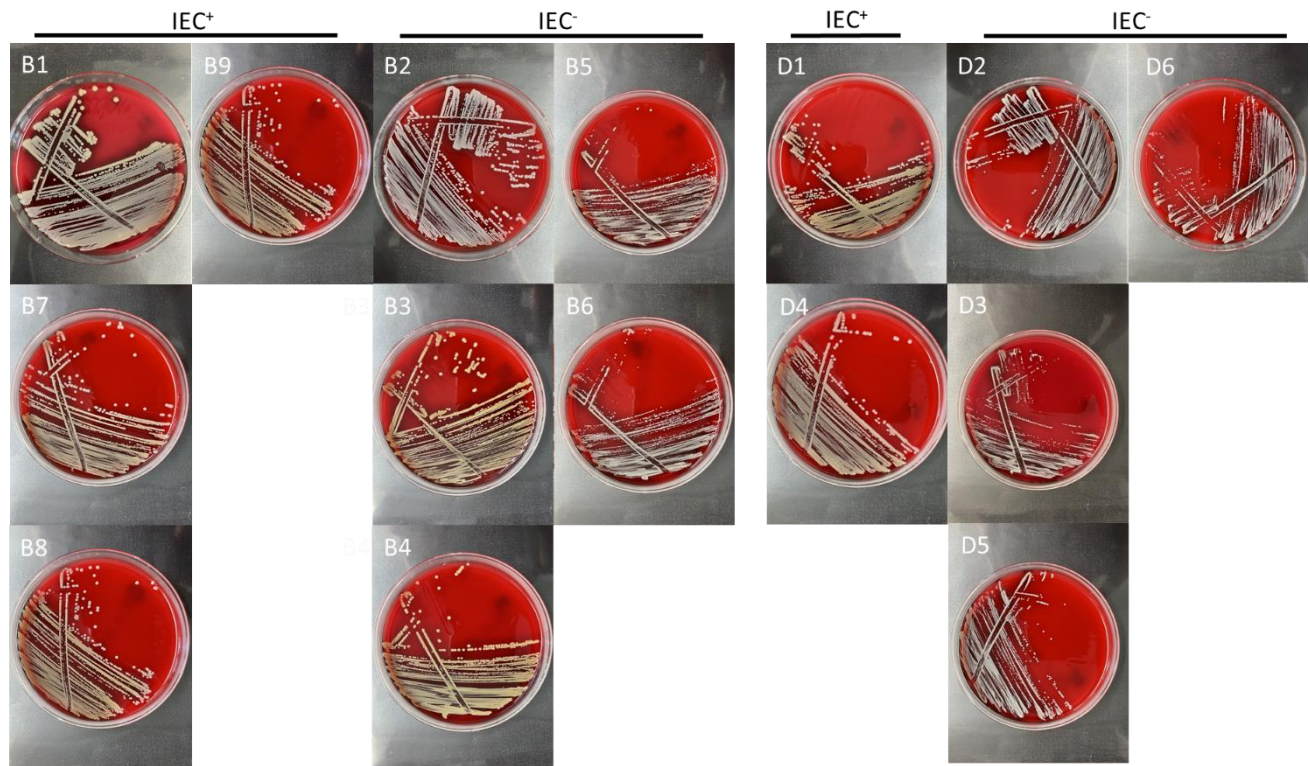

**Supplementary Figure 4.** Macromorphology of *S. aureus* isolates on Columbia blood agar. Morphology of isolates on Columbia blood agar following 24h cultivation. For numbering of isolates, see Supplementary Figure 1.

**A**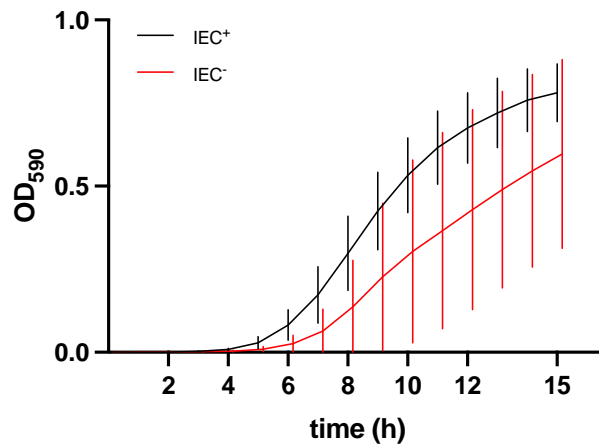**B**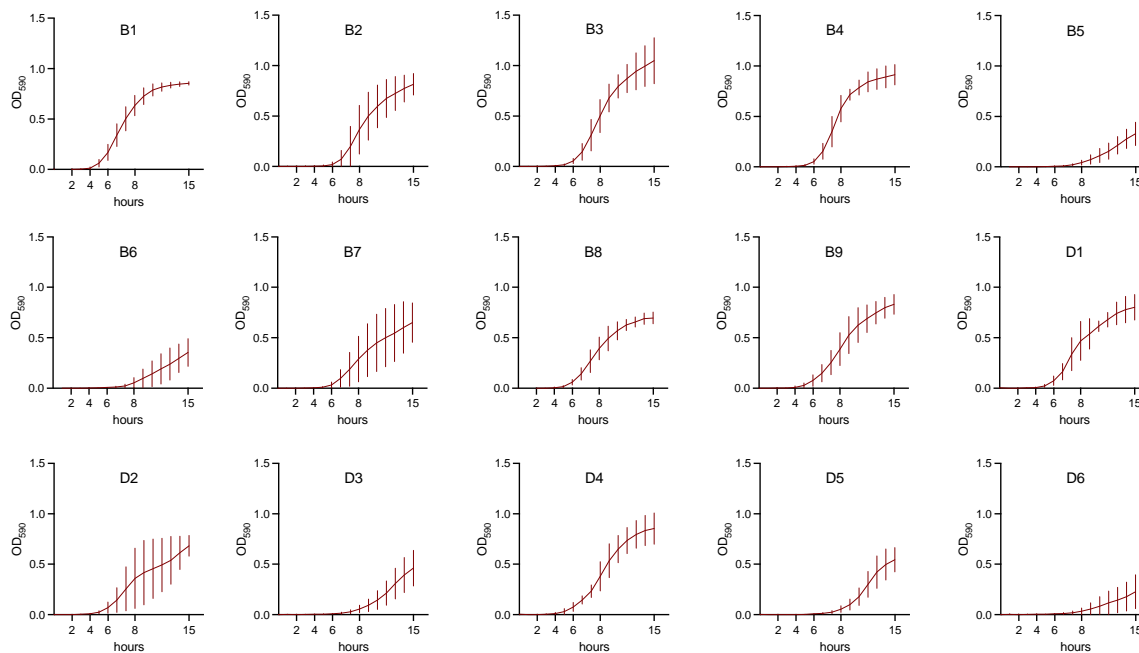

**Supplementary Figure 5.** Growth characteristics of bacterial isolates. Growth was determined by measuring the OD at 590nm every 5 min at 37°C for 15 hours in total. (A) There was no significant association between the growth characteristics of IEC<sup>-</sup> and IEC<sup>+</sup> isolates. Growth curve of all study isolates (performed as three independent experiments with technical triplicates each) in tryptic soy broth at 37° C, grouped by the IEC genotype. Data points of isolates belonging to the IEC<sup>-</sup> group were nudged on the x-axis by 10 data points for better visibility of standard deviations (only shown at full hours). (B) Individual growth curves of all study isolates (mean of three biological triplicates shown with standard deviation at full hours).

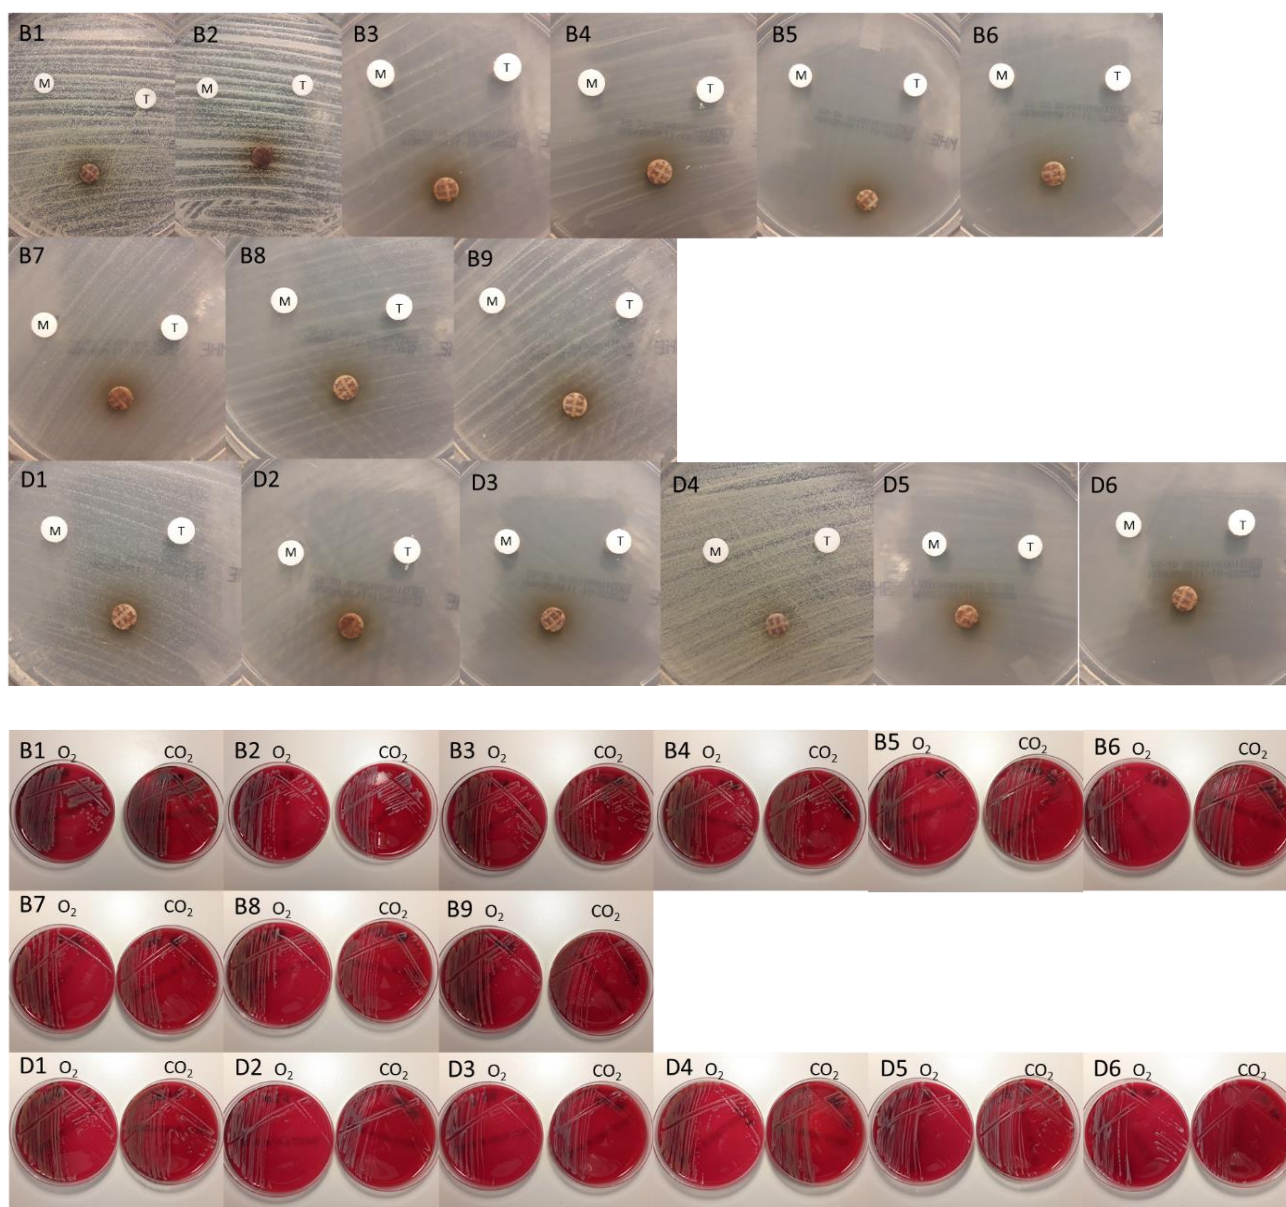

**Supplementary Figure 6.** Testing for auxotrophy. Upper panel: Testing for auxotrophy on Mueller-Hinton agar with impregnated discs with menadione (M), thymidine (T) and hemin (dark discs; X). Lower panel: Overnight culture on Columbia blood sheep agar with or without 5% CO<sub>2</sub>. For enumeration of isolates, see Supplementary Figure 1.

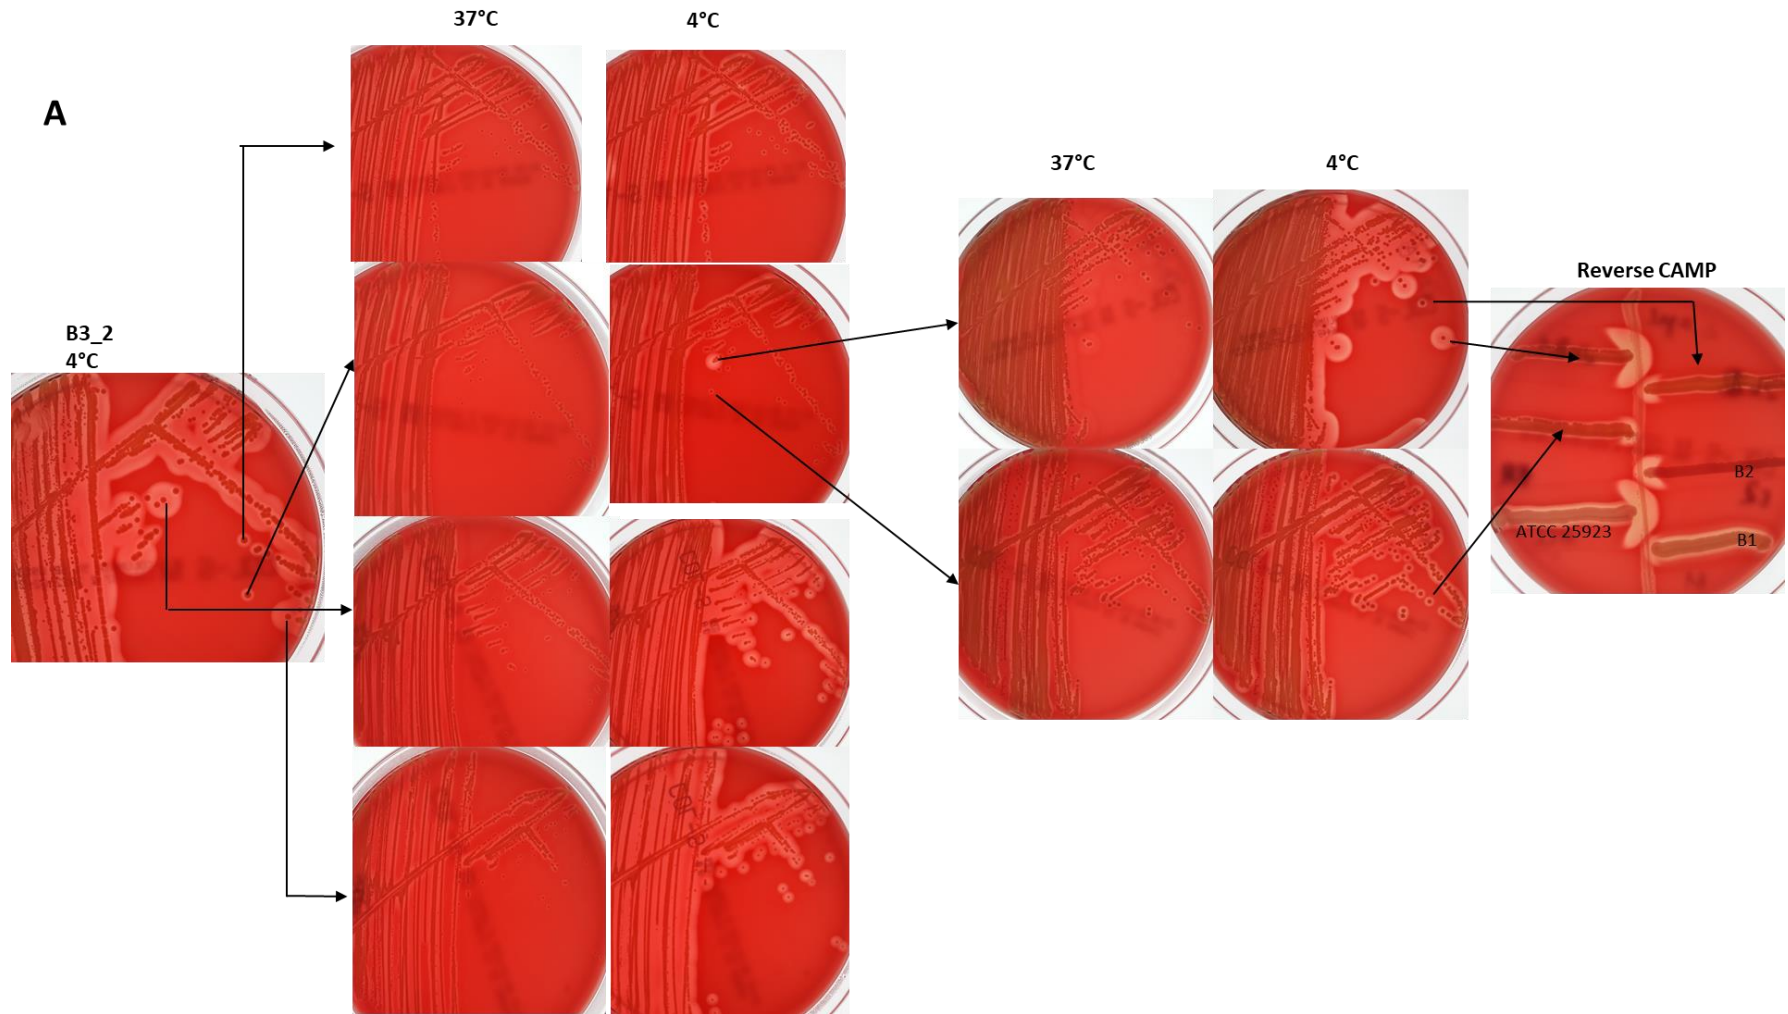



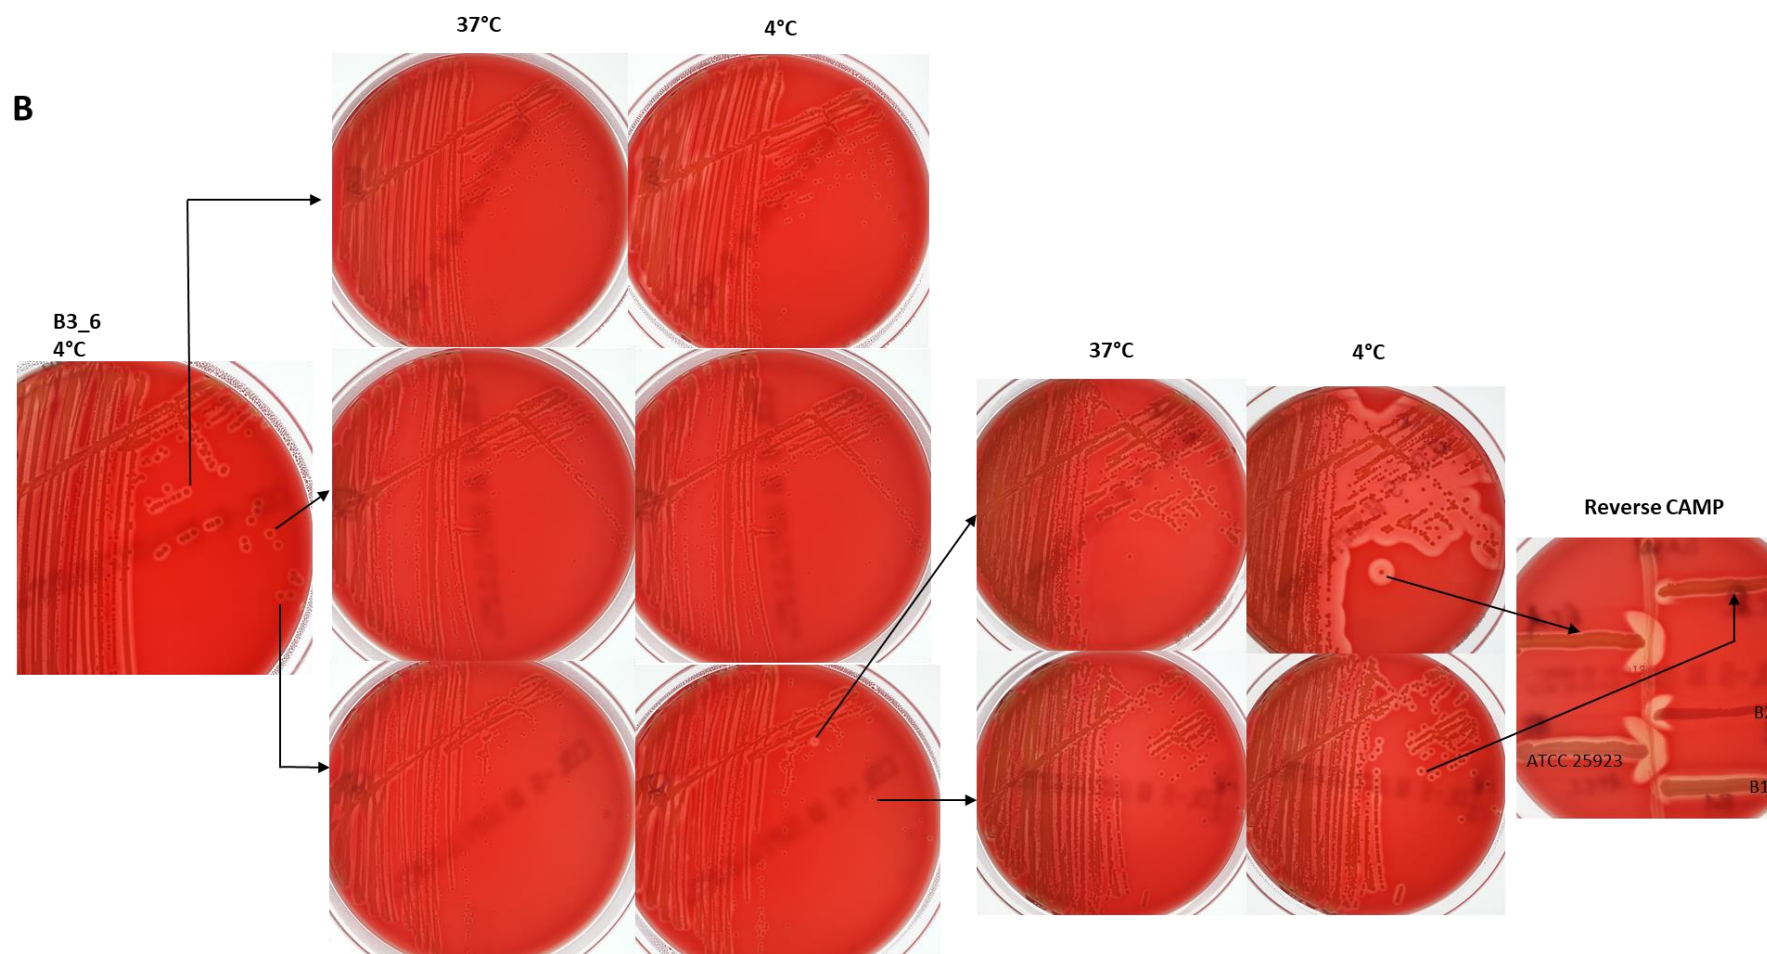

**Supplementary Figure 7.** Testing for  $\beta$ -hemolysis. Single colonies of isolate B3 were subcultured on 5% sheep blood agar at 37°C overnight, then imaged (named 37°C), incubated at 4°C overnight and then imaged again (named 4°C). Enlargement of the hemolysis zone following incubation for 4°C is indicating  $\beta$ -hemolysin production (hot-cold effect). For the reverse CAMP test, the tested colonies were streaked perpendicularly to a *Streptococcus agalactiae* ATCC 27956 reference strain in the middle of a 5% sheep blood agar plate. Enlargement of the hemolysis zone near to the *S. agalactiae*, so called “arrowhead”, indicated  $\beta$ -hemolysin production. *S. aureus* ATCC 25923 was used as positive control and isolates B1 and B2 for comparison. (A) Subcultures of B3\_2, (B) subcultures of B3\_6.
